# Supplementary material for: PNA based artificial nucleases displaying catalysis with turnover in the cleavage of a leukemia related RNA model
Source: Royal Society of Chemistry journal article supplement (doi:10.1039/b810106j), 2008-01-01

## PNA Based Artificial Nucleases Displaying Catalysis with Turnover in Cleavage of a Leukemia Related RNA Model

Merita Murtola<sup>a</sup> and Roger Strömberg\*<sup>a</sup>

5

### Supporting information

**bcr/abl RNA model.** The bcr/abl RNA model was purchased from Dharmacon and was first purified by semi-preparative 10 IE HPLC equipped with an Dionex NucleoPac PA-100 (9 × 250 mm) column. A linear gradient of 0-40 % buffer B over 30 min was used with a flow rate of 4 ml/min (A) 20 mM NaOAc in 30 % aqueous acetonitrile and (B) 20 mM NaOAc, 0.6 M LiClO<sub>4</sub> in 30% aqueous acetonitrile. The collected fractions were lyophilized and then purified with RP HPLC using ODS Hypersil (250 × 10 mm, 5 μm) column. A linear gradient of 0-23 % buffer B over 30 min was used with a flow rate of 3 ml/min (A) 50 mM triethylammonium acetate in water (pH 6.5) and (B) 50 mM triethylammonium acetate (pH 6.5) in 15 % aqueous acetonitrile. Purifications of the bcr/abl RNA model were performed at 40 °C. The RNA was lyophilized three times before use and stored as frozen solution. ES-TOF: mass calculated for the bcr/abl RNA model C144H179N61O99P14 [M], 4782; found, 4783.

**Thermal melting analysis.** Absorbance vs temperature profiles were measured at 260 nm on a Varian Cary 300 UV-Vis dual beam spectrophotometer (Varian). The samples were prepared by mixing two oligonucleotide strands in a 1:1 ratio, 4 μM of each, in a 10 mM phosphate buffer containing 100 mM NaCl and 0.1 mM EDTA at pH 7.0. Extinction coefficients were calculated from the nearest-neighbour approximation.<sup>1</sup> A thermostatable (peltier) multicell (6 + 6) block was used to simultaneously monitor samples. The samples were rapidly heated to 90 °C, left for 5 min and then allowed to cool to 10 °C. After equilibration for 10 min at the starting temperature, the dissociation was recorded by heating to 90 °C at rate of 25 0.2 °C/min and data points were collected every 0.1 °C. The Varian Cary WinUV software, version 3 was used to determine the melting temperatures (T<sub>m</sub>) by fitting the melting profile to two-state transition model.<sup>1</sup> with linearly sloping lower and upper baselines. Reported values are the average of at least two experiments. T<sub>m</sub>(PNAzyme 1)=55 °C, T<sub>m</sub>(PNAzyme 2)=55 °C, T<sub>m</sub>(PNAzyme 3)=52 °C and T<sub>m</sub>(PNAzyme 4)=54 °C. Observed melting points for PNAzymes 1 and 2 were approximately 10 degrees higher than for the corresponding 2'-O-Me systems (Figure S1). T<sub>m</sub>(2'-O-MeOBAN 30 1)=46 °C and T<sub>m</sub>(2'-O-MeOBAN 2)=46 °C.

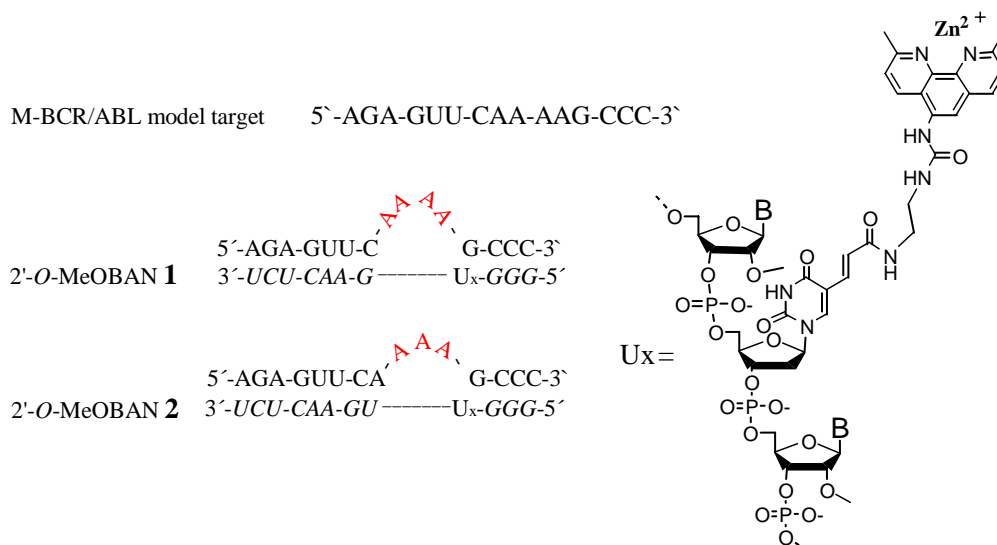

**Figure S1.** Complexes of 2'-O-MeOBAN's 1 and 2 with the M-BCR/ABL RNA model.

### HPLC-analysis of turnover reaction with 1:10 ratio of PNAzyme 1 and RNA

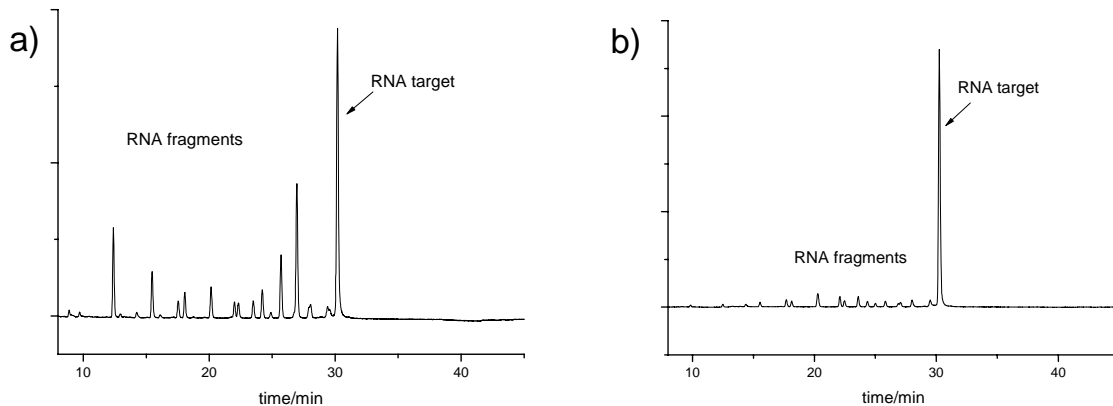

**Figure S2.** HPLC analysis of reaction in presence of a) PNAzyme 1 and RNA (1:10, PNAzyme:RNA) b) zinc aquo ions and RNA substrate alone. Reactions were carried out using the same effective concentration of  $Zn^{2+}$  ( $50 \mu M$ ) and were analysed at the same time point (76 h).

### Examples of plots from experiments with 1:1 ration of PNA-zyme to RNA for the determination of rate constant (Rate constants reported in Table 1 were the average of at least 2 such experiments)

10

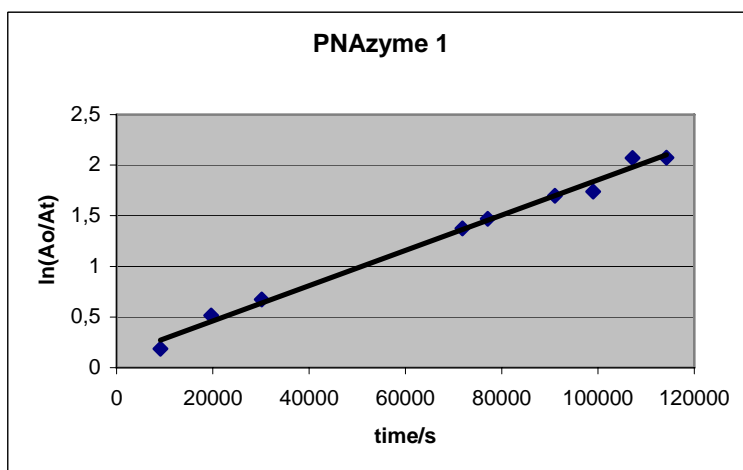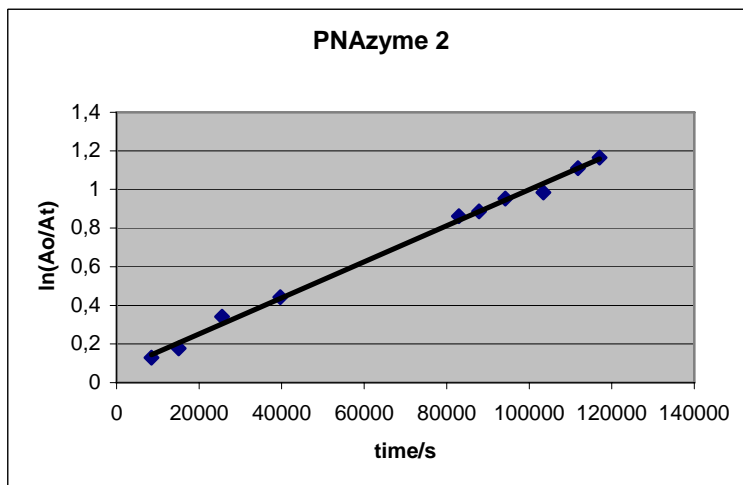

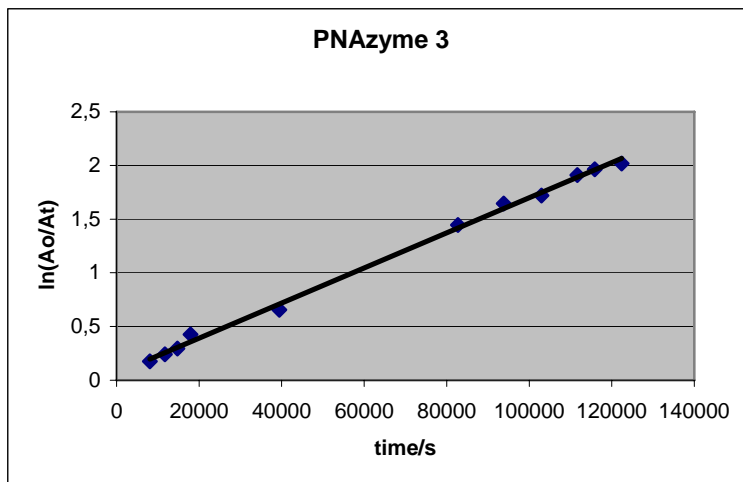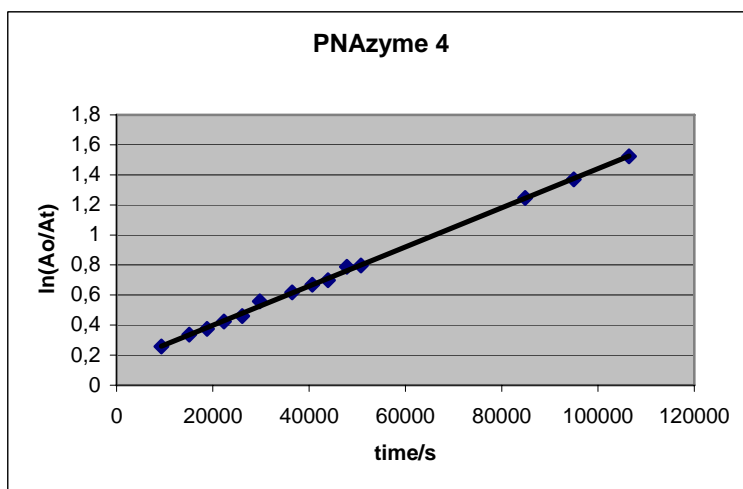

Supplement: b810106j.pdf [file b810106j.pdf]
